# Supplementary material for: KGML-ag: A Modeling Framework of Knowledge-Guided Machine Learning to Simulate Agroecosystems: A Case Study of Estimating N 2 O Emission using Data from Mesocosm Experiments
Source: Copernicus journal article supplement (doi:10.5194/gmd-2021-317), 2021-10-14
Supplement: Supplementary file [file gmd-2021-317-AC4-supplement.pdf]

## Response Letter

We are grateful to all comments and suggestions from three reviewers and have carefully addressed their concerns point by point. Major changes include:

- (1) We have conducted uncertainty analysis for all pure machine learning models and KGML models presented in our study to include the machine learning model uncertainties;
- (2) The uncertainties of process-based model *ecosys* and its performance over various ecosystem for N<sub>2</sub>O and CO<sub>2</sub> have been added into the maintext;
- (3) We have added LSTM results into the supplement and comparing with all other models for reference;
- (4) We have added a new paragraph in discussion to address the concerns of KGML-ag limitations;
- (5) We have clarified all the confusing parts which have been pointed out by reviewers, and corrected typo and grammatical errors.

By changing these major concerns and many other minor comments and suggestions, we believe the quality of this manuscript is improved. Below, please find our detailed responses point-by-point.

### Please be aware of the formatting of all responses:

1. Reviewer comment in **black**, response in **blue** and quotation from the main text in **red**;
2. The line number is based on the clean version of the revised manuscript, not the track change version.

## To Reviewer 1

Liu et al. presented a promising predictive framework that combined a process-based model (physical knowledge and pre-train dataset) and a machine learning model for agroecosystem N<sub>2</sub>O emission estimate. The modeling framework is robust and thoroughly validated. This work will be an important milestone towards a better understanding, monitoring, and predicting agroecosystem greenhouse gas emissions.

The paper is well organized and written. Below are some of my comments that may help elucidate the strength and limitations of the proposed KGML-ag framework.

Response: We really appreciate that the reviewer recognized our efforts in developing the proper knowledge guided machine learning framework for agroecosystem. To improve the quality of this study, we have carefully revised the manuscript based on the reviewer's comments and suggestions shown as below:

### 1. Robustness of physical (prior) knowledge

*ecosys* model plays a central role in guiding the ML model in terms of structure and providing a pre-train dataset. It will be important to discuss the structure uncertainty in *ecosys* N<sub>2</sub>O module, including e.g., underlying theories, major processes, difference/similarity to the classic leaky pipe type model (Davidson et al., 2000), and so on.

Reference:

Davidson, E. A., Keller, M., Erickson, H. E., Verchot, L. V., & Veldkamp, E. (2000). Testing a conceptual model of soil emissions of nitrous and nitric oxides: using two functions based on soil nitrogen availability and soil water content, the hole-in-the-pipe model characterizes a large fraction of the observed variation of nitric oxide and nitrous oxide emissions from soils. *Bioscience*, 50(8), 667-680.

Response: Thank you so much for this suggestion. In this revision, we have added a detailed description on the major processes of N<sub>2</sub>O production and transfer in *ecosys* model, and on the differences between traditional pipeline N<sub>2</sub>O model and *ecosys* model. You can find the description in the manuscript section 2.2.1 (from Line 136 to 147) as:

“It represents N<sub>2</sub>O evolution in the microbe-engaged processes of nitrification-denitrification using substrate kinetics that are sensitive to soil nitrogen availability, soil temperature, soil moisture, and soil oxygen status (Grant and Pattey 2008). Two groups of microbial populations, autotrophic nitrifiers and heterotrophic denitrifiers, produce N<sub>2</sub>O with specific competitive or cooperative relations in *ecosys* when O<sub>2</sub> availability fails to meet O<sub>2</sub> demand for their respirations and NO<sub>2</sub><sup>-</sup> become alternative electron acceptors. N<sub>2</sub>O transfer within soil layers and from soil to the atmosphere is driven by concentration gradient using diffusion-convection-dispersion equations, in the forms of gaseous and aqueous N<sub>2</sub>O under control of volatilization-dissolution (Grant et al., 2016). Unlike the pipeline model described by Davidson et al. (2000), which mainly consider the correlations of N<sub>2</sub>O production with nitrogen availability and of N<sub>2</sub>O emitting with soil water content, *ecosys* enables integrative effects of energy, water, nitrogen availability on N<sub>2</sub>O production and N<sub>2</sub>O transfer via the microbial population dynamics and their

interactions with soil, plant, and atmospheric dynamics, under diverse meteorological and anthropogenic disturbances (e.g. runoff, drainage, tillage, irrigation, soil erosion).”

Again *ecosys* provides pretrain dataset, which has its own uncertainty and biases. It’s worthwhile to at least show some *ecosys* model performance across various different conditions at agroecosystems. For example, does *ecosys* pick up the high-frequency signals (fluctuation) of CO<sub>2</sub>/N<sub>2</sub>O flux that are observed in the chambers data? If not, is that the reason why PGML-ag could not capture the high fluctuation of CO<sub>2</sub>/N<sub>2</sub>O emissions in the field?

Response: We really appreciate this comment which suggests to show the capability of *ecosys* model as the domain knowledge provider. To show the *ecosys* model performance on simulation of CO<sub>2</sub> and N<sub>2</sub>O emissions at field, we have added detailed quantitative comparisons between model simulations and observations in the manuscript section 2.2.1 (from line 149 to 154):

“For the agricultural ecosystems in the US Midwest, whose simulations are used for synthetic data in this study, the performance of *ecosys* on CO<sub>2</sub> and N<sub>2</sub>O fluxes have been extensively benchmarked, including CO<sub>2</sub> exchange (NEE, R<sup>2</sup> = 0.87) and leaf area index (LAI, R<sup>2</sup> = 0.78) from six flux towers, USDA census reported corn yield (R<sup>2</sup> = 0.83) and soybean yield (R<sup>2</sup> = 0.80), satellite-derived GPP for corn (R<sup>2</sup> = 0.83) and soybean (R<sup>2</sup> = 0.85) from Illinois, Iowa and Indiana, and cumulative N<sub>2</sub>O emissions (R<sup>2</sup> = 0.36) across eight Midwestern states (Wang et al., 2021; Yang et al., 2022).”

If you are interested in the more detailed performance of field level N<sub>2</sub>O emission simulation using *ecosys* model, you may review 1) the papers of Grant et al (2006, 2008) to find the influences of fertilizer rate and temperature on N<sub>2</sub>O emissions in fertilized agriculture soil; 2) the paper of Grant et al (1999) to find the influences of spring thawing; and 3) the papers of Grant et al (2010, 2016) to check the N<sub>2</sub>O simulation performances at managed forest and grassland.

2. It’s not obvious which variables are used as inputs or intermediate variables and how that relates to the feature importance ranking. It will be better to show each variable in Figure 1. For example, W will be temperature and precipitation. Furthermore, feature importance analysis highlight NH<sub>3</sub>, H<sub>2</sub>, N<sub>2</sub>, O<sub>2</sub>, CH<sub>4</sub>, ET, CO<sub>2</sub> are important variables that drive N<sub>2</sub>O emission (~ L230). It’s not clear in the main text, how this feature importance ranking helps the design of PGML-ag. What can we get out of this feature importance analysis?

Response: Thanks for pointing out the confusing part of how feature importance related to KGML model development. In this revision, we have extended descriptions in Figure 1 caption to explain W, SCP and IMVs that are used in our study.

“Figure 1: The model structures. a) The *ecosys* model; b) Gated recurrent unit (GRU) model; c) KGML-ag1 model with a hierarchical structure; d) KGML-ag2 model with a hierarchical structure using separated GRU modules for IMV predictions. Specifically, in our KGML model design, weather forcings (W) include temperature (TMAX, TDIF), precipitation (PRECN), radiation (RADN), humidity (HMAX and HDIF) and wind speed (WIND); soil/crop properties (SCP) include bulk density (TBKDS), sand content (TCSAND), silt content (TCSILT), pH (TPH), cation exchange capacity (TCEC), soil organic

carbon (TSOC), planting day of the year (PDOY) and crop type (CROPT); IMVs include CO<sub>2</sub> flux, soil NO<sub>3</sub><sup>-</sup> concentration, soil NH<sub>4</sub><sup>+</sup> concentration, and soil volumetric water content (VWC).”

Feature importance analysis was the first step in our study to learn the knowledge from synthetic data generated by the *ecosys* model and to investigate the correlation between input/intermediate variables and N<sub>2</sub>O fluxes. The importance rankings help us to put low/median/high attention to available variables during model development (e.g. CO<sub>2</sub> was tested as a higher ranking variable than others so that we paid high attention to it by testing two different combinations of IMVs w/o CO<sub>2</sub>). In addition, the rankings will provide guidance of future N<sub>2</sub>O related measurement, which is discussed in section 4.3. We have revised paragraph two in section 2.2.4 to highlight how feature importance rankings help our model development (from line 252 to 258).

“Variables ranked high in feature importance analysis are considered with priority during model development. To develop a functionable KGML-ag, we further investigated the feature importance of four IMVs that are available from mesocosm observations including CO<sub>2</sub>, NO<sub>3</sub><sup>-</sup>, VWC and NH<sub>4</sub><sup>+</sup>, which were ranked 7th, 20th, 58th, 60th respectively in 92 input features of synthetic data (Fig. S2a). We used these four available IMVs to create two input combinations: 1) CO<sub>2</sub> flux, NO<sub>3</sub><sup>-</sup>, VWC and NH<sub>4</sub><sup>+</sup> (IMVcb1), and 2) NO<sub>3</sub><sup>-</sup>, VWC and NH<sub>4</sub><sup>+</sup> (IMVcb2). The objective of building IMVcb2 was to investigate the importance of highly ranked variable CO<sub>2</sub> flux (by removing it from the inputs), and the impact of mixing-up flux and non-flux variables on model performance. ”

3. There is a lack of discussion on uncertainty in PGML-ag, which is fundamentally important for predictive modeling. Also, what about chamber measurements uncertainty?

Response: Thank you for pointing out this concern for predictive modeling. To address the uncertainty of the machine learning models and KGML-ag model, we have conducted 10 ensemble experiments for different model structures (DT, RF, GB, XGB, ANN, GRU, KGML-ag1 and KGML-ag2). Corresponding method part in section 2.1 has been updated (from line 125 to 129).

“We further benchmarked KGML-ag models and uncertainties with other pure ML models without considering temporal dependence, including Decision Tree (DT), Random Forest (RF), Gradient Boosting (GB) from the sklearn package (<https://scikit-learn.org/stable/>), Extreme Gradient Boosting (XGB) from the XGBoost package (<https://xgboost.readthedocs.io/en/latest/>) and a 6-linear-layer artificial neural network (ANN) with the mesocosm experiment data by 10 times ensemble experiments (Fig. 4-5; Fig. S6-8);”

The new results have been updated in Figure 4 and Figure 5 (also as Figure R1 and R2 below) in the main text and Figure S6-S7 (also as Figure R3 and R4 below) in the supplementary. We have also updated values in section 3.3 accordingly. For chamber measurement uncertainty, we have cited the original thesis (Miller L., 2021) including the mesocosm experiment settings, instruments and related measurement uncertainties (e.g. Figure 2.2 in the thesis). In our study, we also used a data augmentation method to cover the uncertainties caused by converting hourly observations to daily observations. The data augmentation method has been described in section 2.2.2 paragraph 3.

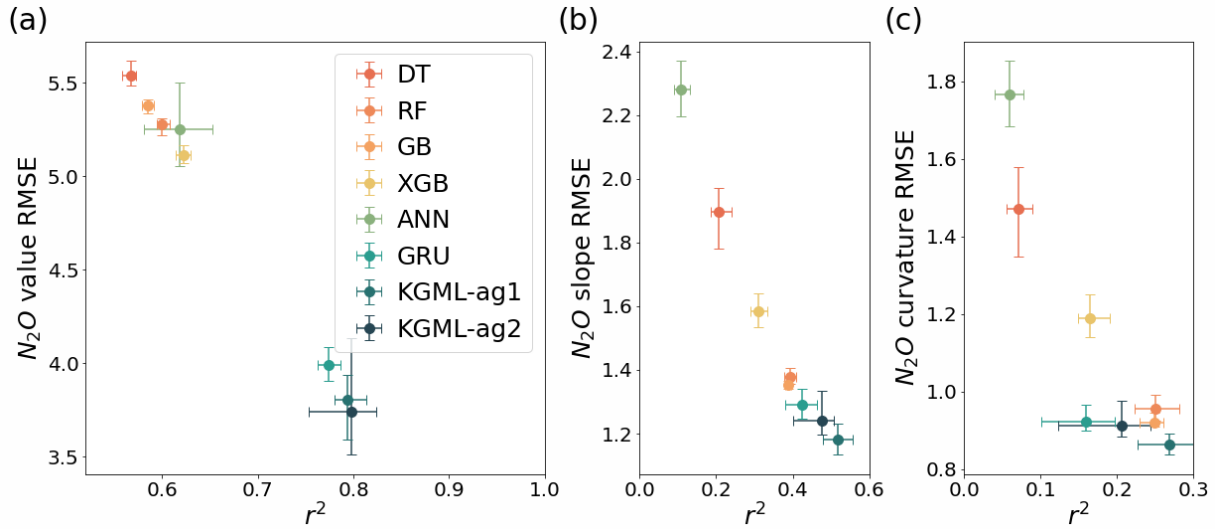

Figure R1: The comparisons of overall prediction accuracy for  $N_2O$  value (a), 1st order gradient (slope, b) and 2nd order gradient (curvature, c) between four tree-based ML models (DT, RF, GB and XGB), two deep learning models (ANN, GRU), and KGML-ag models. Different color symbols represent the different models. The x- and y-error bars are coming from the maximum and minimum scores of ensemble experiments. The dot represents the mean score of the ensemble experiments.

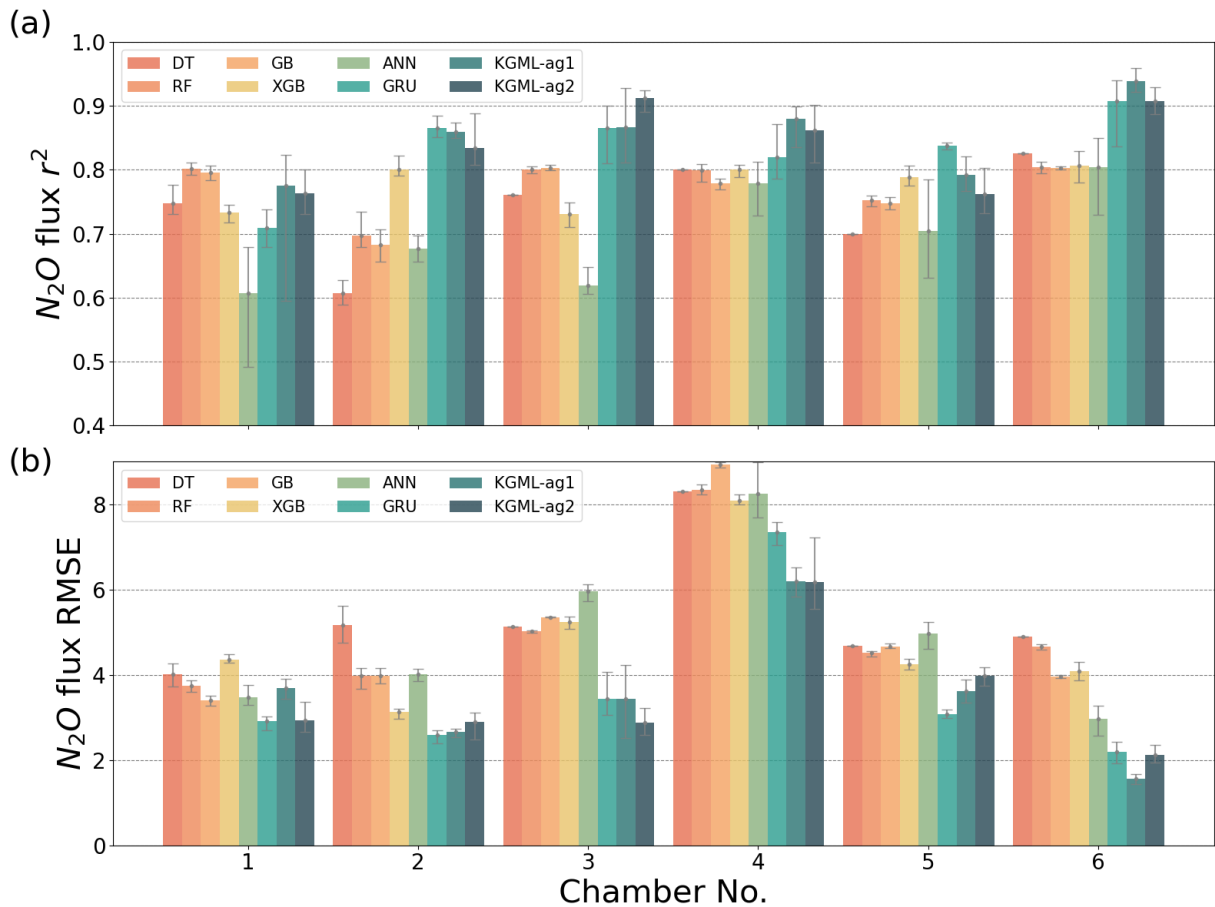

Figure R2: The comparisons of  $N_2O$  flux prediction accuracy  $r^2$  (a) and (b) RMSE, between four tree-based ML models (DT, RF, GB and XGB), two deep learning models (ANN and GRU), and KGML-ag models in 6 chambers. The gray error bars are coming from the maximum and minimum scores of ensemble experiments.

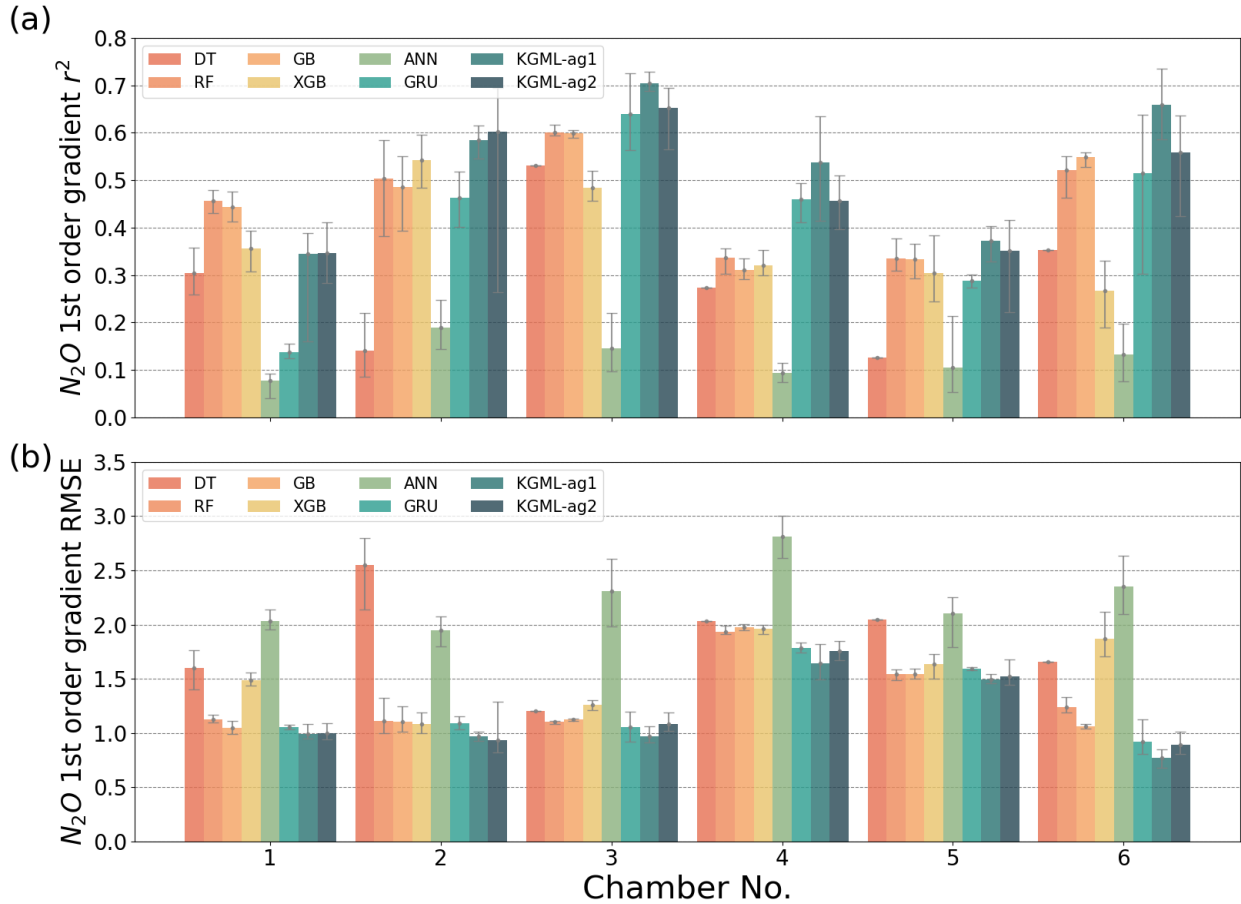

Figure R3: The comparisons of  $N_2O$  1st order gradient prediction accuracy  $r^2$  (a) and (b) RMSE, between four tree-based ML models (DT, RF, GB and XGB), two deep learning models (ANN and GRU) and KGML-ag models in 6 chambers. The gray error bars are coming from the maximum and minimum scores of ensemble experiments.

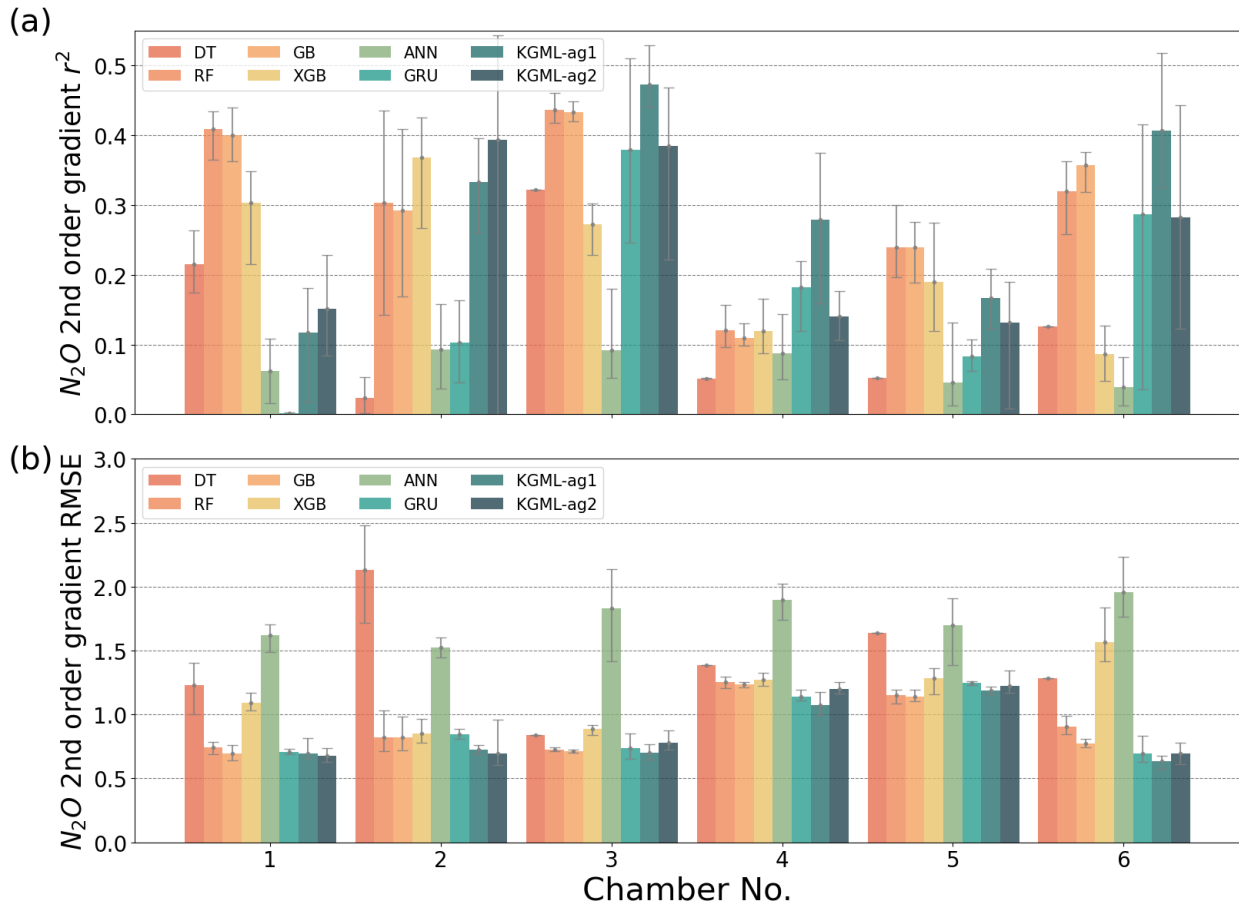

Figure R4: The comparisons of  $N_2O$  2nd order gradient prediction accuracy  $r^2$  (a) and (b) RMSE, between four tree-based ML models (DT, RF, GB and XGB), two deep learning models (ANN and GRU) and KGML-ag models in 6 chambers. The gray error bars are coming from the maximum and minimum scores of ensemble experiments.

L254 based on the structure of process representation in ecosys

Response: We have revised the sentence based on your suggestion (Line 276 to 278).

“We built a hierarchical structure based on the structure of process representation in *ecosys* to first predict IMVs and then simulate  $N_2O$  with predicted IMVs;”

References:

Grant, R. F., Black, T. A., Jassal, R. S., & Bruemmer, C.: Changes in net ecosystem productivity and greenhouse gas exchange with fertilization of Douglas fir: Mathematical modeling in *ecosys*. *Journal of Geophysical Research: Biogeosciences*, 115(G4), 2010.

Grant, R. F., & Pattey, E.: Mathematical modeling of nitrous oxide emissions from an agricultural field during spring thaw. *Global Biogeochemical Cycles*, 13(2), 679-694, 1999.

Grant, R. F., & Pattey, E.: Temperature sensitivity of N<sub>2</sub>O emissions from fertilized agricultural soils: Mathematical modeling in ecosys. *Global biogeochemical cycles*, 22(4), 2008.

Grant, R. F., Neftel, A., & Calanca, P.: Ecological controls on N<sub>2</sub>O emission in surface litter and near-surface soil of a managed grassland: modelling and measurements, *Biogeosciences*, 13(12), 3549-3571, 2016.

Grant, R. F., Pattey, E., Goddard, T. W., Kryzanowski, L. M., & Puurveen, H.: Modeling the effects of fertilizer application rate on nitrous oxide emissions, *Soil Science Society of America Journal*, 70(1), 235-248, 2006.



## To Reviewer 2

### General comments

This manuscript presents a new method for estimating N<sub>2</sub>O flux from cropland. The inputs to the method are known fertilization rate, weather forcings, soil and crop properties. The method also requires initial concentrations of nitrate ions, ammonium ions, and water in the soil, and optionally CO<sub>2</sub> flux. The method employs gated recurrent networks organized in a hierarchical structure to mirror the time-dependence and causality present in the process. A process-based model provides pre-training data, and fine-tuning is done using observations from mesocosm experiments. The trained neural network models outperform the process-based model and many basic machine learning approaches.

The methodology employed is both novel and sound. The use of GRUs in hierarchical structures is well-justified and appropriate to the problem. The models have been well-validated, and various alternate choices for model architecture have been explored. I believe this work represents a substantive advance in modelling science. Below I list specific comments which I hope will serve to improve the manuscript.

Response: We really appreciate the reviewer's recognition of our work and all other valuable comments and suggestions mentioned below. Just as the reviewer summarized, we want to incorporate the domain knowledge learned from agroecosystem process-based model *ecosys* to the advanced machine learning models to combine the advantages from both kinds of state-of-art works. This effort is trying to build a new body of research for simulating the agriculture ecosystem and KGML-ag in this study is a demonstration case simulating N<sub>2</sub>O flux from mesocosm experiments. To further improve our study, we have carefully revised the manuscript to address all reviewer's comments. The specific responses can be found in the following letters.

### Specific comments

1. The use of the term "initials" confuses me. Upon first reading I thought it referred to the acronyms for various intermediate variables. I think it actually refers to the initial values of a sequence. Is this usage standard? If not, I recommend a different phrase such as "initial values" in place of the word "initials." Alternatively, clarify the meaning of the term in the manuscript.

Response: Thanks so much for pointing out this term which may cause confusion. Just as you said, the term "initials" in the manuscript are most referring to the "initial values". It indeed will cause some confusion since we also use the term "initial" as a verb for the knowledge guided initialization. Thus we have replaced "initials" to "initial values" throughout the manuscript.

2. Another possible explanation for why KGML-ag2 better predicts IMVs but does not predict N<sub>2</sub>O as well is that KGML-ag1 may learn to use the IMVs as a kind of extra hidden layer, encoding information relevant to N<sub>2</sub>O predictions in them.

Response: We really appreciate your interesting explanation about why KGML-ag2 predicts better IMVs but worse N<sub>2</sub>O fluxes. In both KGML-ag1 and KGML-ag2, the IMVs were first predicted from KGML-ag-IMV modules and then input into the KGML-ag-N<sub>2</sub>O modules. The only difference between

KGML-ag1 and KGML-ag2 is that KGML-ag2 explicitly simulates each IMV by using individual KGML-ag-IMV modules. Thus, using IMVs as a kind of extra hidden layer may happen in both models in KGML-ag-N<sub>2</sub>O modules. But since KGML-ag1 has interactions between predicted IMVs and lower complexity, it may be easier for the KGML-ag1-N<sub>2</sub>O module to get the useful knowledge from IMVs.

Moreover, your valuable thought draws us to deeply review the model structures and data qualities. The observational data, including the IMVs of CO<sub>2</sub>, NH<sub>4</sub><sup>+</sup>, NO<sub>3</sub><sup>-</sup> and VWC, are not perfect and may have many noises or be lacking some key information. KGML-ag2-IMV module may only follow what we have for IMVs to generate accurate IMV predictions without any extra information, while KGML-ag1-IMV module may perform like an encoding layer to predict IMVs with extra information relevant to N<sub>2</sub>O flux, just as you mentioned.

In this revision, we decided to keep our explanation to make our discussion more focused and accessible to a broader audience. But we will find a larger dataset to test both explanations in subsequent ML-oriented technical papers.

3. Why not include KGML-ag2 in Figure 4? I can see simplifying the comparison by choosing only the best-performing model.

Response: The reviewer is right that we excluded KGML-ag2 in the previous Figure 4 to simplify the comparison. To address the reviewer's concern, we have added similar 10 ensemble experiments for KGML-ag2 and updated Figure 4 (also as Figure R5 below). We can see that although KGML-ag2 has similar mean performance as the KGML-ag1 but it has much larger uncertainties. Moreover, the best scores for slope and curvature are all from KGML-ag1.

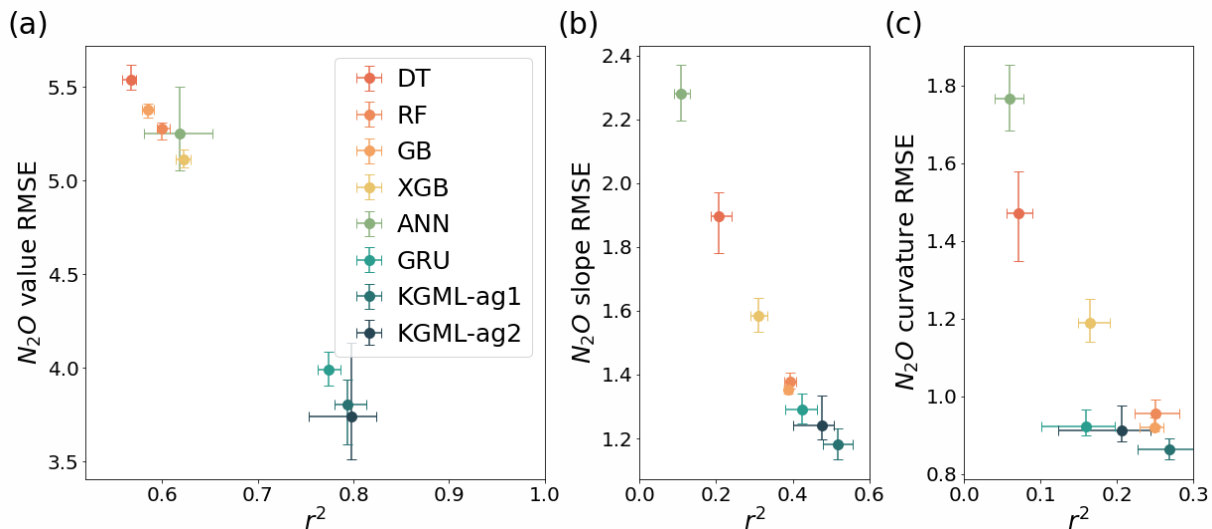

Figure R5: The comparisons of overall prediction accuracy for N<sub>2</sub>O value (a), 1st order gradient (slope, b) and 2nd order gradient (curvature, c) between four tree-based ML models (DT, RF, GB and XGB), two deep learning models (ANN, GRU), and KGML-ag models. Different color symbols represent the different models. The x- and y-error bars are coming from the maximum and minimum scores of ensemble experiments. The dot represents the mean score of the ensemble experiments.

We have also updated the corresponding figures including Figure 5, Figure S6-S7, and section 3.3 (From line 399 to 405).

“The results from eight different models showed that KGML-ag1 comparing with other pure ML models consistently provided the lowest RMSE (3.59-3.94 mg N m<sup>-2</sup> day<sup>-1</sup>, 1.14-1.23 mg N m<sup>-2</sup> day<sup>-2</sup>, and 0.84-0.89 mg N m<sup>-2</sup> day<sup>-3</sup>) and highest r<sup>2</sup> (0.78-0.81, 0.48-0.56, and 0.23-0.31) for N<sub>2</sub>O fluxes, slope and curvature, respectively (Fig. 4). This indicated that KGML-ag1 outperformed other pure ML models in capturing both the magnitude and dynamics of N<sub>2</sub>O flux. KGML-ag2 presented slightly better mean scores for N<sub>2</sub>O flux predictions than KGML-ag1, but worse scores for slope and curvature and larger uncertainties. This proved the hypothesis discussed in section 3.2 that KGML-ag2 didn't benefit the magnitude and dynamics predictions of N<sub>2</sub>O flux with its more complex structure and less connections between IMVs”

4. Many standard deep learning models were included for comparison, but an LSTM was not among them. I would expect the LSTM to perform similarly to the GRU. I don't think it is crucial that an LSTM be included in this comparison. However, if the GRU outperforms an LSTM, it could provide further justification for choosing to use a GRU instead of an LSTM. Again, I could understand simplifying the comparison by including only one recurrent neural network.

Response: We fully agree with your comments on LSTM. We have tested both GRU and LSTM as mentioned in section 2.2.3, and preliminary results showed similar performance between the two neural network structures. However, to simplify the comparison and streamline the discussion, we fixed GRU as the basis for pure machine learning models and the KGML models.

To address the reviewer's concern, we have conducted similar 10 ensemble experiments of LSTM and the comparisons are presented here in Figure R1 and in the supplement Figure S8 (best model in ensemble experiment). We can see in Figure R1 that the LSTM is slightly better than GRU in predicting N<sub>2</sub>O flux value and similar as KGML-ag1. But for slope and curvature predictions, LSTM is similar to GRU and KGML-ag1 can always outperform LSTM. From Figure S8 demonstration case, the LSTM with r<sub>L</sub><sup>2</sup> of 0.72 and r<sub>U</sub><sup>2</sup> of 0.73 is better than GRU model (r<sub>L</sub><sup>2</sup> of 0.60 and r<sub>U</sub><sup>2</sup> of 0.57) but worse than KGML-ag1 (r<sub>L</sub><sup>2</sup> of 0.78 and r<sub>U</sub><sup>2</sup> of 0.86). This further proved our conclusion that KGML-ag1 better represents complex dynamics of N<sub>2</sub>O flux than other pure machine learning models.

5. You tested two input combinations, IMVcb1 and IMVcb2, but it is not clear how that test informed the model development.

Response: Thank you for finding this unclear part in our manuscript. We have added more descriptions to clarify why we have tested two combinations in section 2.2.4 paragraph 2 (From line 252 to 258).

“Variables ranked high in feature importance analysis should be primarily considered during model development. To develop a functionable KGML-ag in real world, we further investigated the feature importance of four IMVs that are available from mesocosm observations including CO<sub>2</sub>, NO<sub>3</sub><sup>-</sup>, VWC and NH<sub>4</sub><sup>+</sup>, which were ranked 7th, 20th, 58th, 60th respectively in 92 input features of synthetic data (Fig. S2a). We used these four available IMVs to create two input combinations: 1) CO<sub>2</sub> flux, NO<sub>3</sub><sup>-</sup>, VWC and NH<sub>4</sub><sup>+</sup> (IMVcb1), and 2) NO<sub>3</sub><sup>-</sup>, VWC and NH<sub>4</sub><sup>+</sup> (IMVcb2). The objective of building IMVcb2 was to investigate the importance of highly ranked variable CO<sub>2</sub> flux (by removing it from the inputs), and the impact of mixing-up flux and non-flux variables on model performance.”

Moreover, tests using IMVcb1 (with CO<sub>2</sub>) and IMVcb2 (without CO<sub>2</sub>) indicate that high ranking variables detected from feature importance analysis based on synthetic data (like CO<sub>2</sub> flux ranks 7th in 92 input features ) can also be similarly important in N<sub>2</sub>O predictions with real observed data. Therefore the feature importance results could benefit feature selection in real data. We have added the results and discussion in section 3.2 last paragraph (From line 395 to 397).

“In addition, we also found all KGML-ag models would perform better by using IMVcb1 (with CO<sub>2</sub>) than using IMVcb2 (without CO<sub>2</sub>) in real data tests, indicating feature importance analysis based on synthetic data can be a reasonable substitute for analysis with the often limited real-world data.”

6. The reason for evaluating slope and curvature in addition to N<sub>2</sub>O value could be stated more clearly.

Response: We have added more explanations in section 3.2 paragraph 2 (From line 373 to 375).

“Slope represents the speed of N<sub>2</sub>O flux changes through time and curvature represents the acceleration. Assessing prediction performance with these two metrics will reveal the model robustness on capture variable dynamics, which is critical when predicting fast-change variables with hot moments like N<sub>2</sub>O.”

7. I recommend that the paragraph starting at line 194 be rewritten for clarity. First, data augmentation is a class of methods, not a single method. Second, Meyer et al. use copula-based models in particular to augment datasets. Do you use copula-based methods? The way this reference is cited suggests that you follow their approach. Third, do you randomly sample observed data, or synthetically generated data, or both? Do you randomly sample only the data which are hourly, e.g., air temperature, net radiation, N<sub>2</sub>O, CO<sub>2</sub>, and VWC? How is the daily value calculated from the sampled data? I did not find the answers to these questions to be clear from the text.

Response: We really appreciate your detailed comments on the data augmentation method. In this revision, we have deleted the confusing sentence “Data augmentation is a typical practice in ML when training data is limited (Meyer et al., 2021)” because we did not intend to highlight one particular method, but only to explain the data augmentation concept using one recent citation. To your second question, the augmentation method is only used on observed data and corresponding weather forcings. To your third question, we only randomly sample the data which are hourly. Lastly, we used the average of the 16 hours (or maximum valid hours) of data to represent the daily values. We have addressed all those questions in the new paragraph in section 2.2.2 (from line 213 to 223):

“To reduce overfitting and increase the generalization of the trained model based on the small amount of mesocosm data, we applied the following method to augment the experimental measurements and weather forcings to 1000 times larger by sampling hourly data and averaging them to daily scale. In this method, 16 hours (or maximum valid hours) of data are randomly selected from 24 hours of data to compute their mean as the daily value. Since 3/4 of the day are covered by the selected data (16 hours /24 hours), the augmented daily values should be representative enough for the source day and meanwhile present slight variations. Furthermore, the observation ratio, (24 hours - missing hours) / 24 hours, can be used as the weights in loss function to inject the data quality information in model optimization. If the day

has more than 16 hours missing values, we consider the observations in that day as not trustworthy and drop the day by setting the weight to 0. This method can not only augment the data to 1000 times larger but also deal with the missing values in observed data inherently. The total amount of observed mesocosm data and related weather forcings are augmented to 122 days x 3 years x 6 chambers x 1000 data samples in this study.”

8. How well does the model perform out-of-sample? Out-of-sample performance is mentioned in the introduction, but the discussion does not address it.

Response: We totally agree with the reviewer that out-of-sample performance would be critical for predictive models. Thus we have mentioned in the introduction that out-of-scenario ability is the limitation of machine learning models. In our study, we have compared the out-of-sample performance between different models using the period without any observation data in section 3.2 paragraph 1 (from line 363 to 366):

“For the region without observation data (normally before day 25), KGML-ag1 predicted stable N<sub>2</sub>O fluxes close to 0 mg N m<sup>-2</sup> day<sup>-1</sup> (which is close to the reality in the experiment setting) while GRU caused anomalous peaks of fluxes. This is because KGML-ag1 has learned knowledge for the whole period from the pretraining process with *ecosys* model generated synthetic data, but GRU model has no prior knowledge for the period without any data in observations;”

and section 3.3 last paragraph (from 424 to 429):

“From these comparisons, we infer that without considering temporal dependence and pretraining process, the tree-based model including DT, RF, GB and XGB and deep learning model ANN predicted erratic peaks in almost every missing data point, while GRU model was stable in small gaps and only presented poor performance in long missing period (before 25 day). This improvement by GRU model can be attributed to the structure of GRU that naturally keeps the historical information using hidden states, which enables GRU to consider the temporal dependence and make consistent predictions over time.”

Moreover, the objective for this study is to explore ways to incorporate knowledge into ML models for improving agriculture ecosystem simulation. The mesocosm experiment measured many inputs and intermediate variables in addition to the output of N<sub>2</sub>O fluxes, thus serving as a unique testbed. Continuous N<sub>2</sub>O flux data with a comprehensive set of input and intermediate variables, especially those at hourly or daily scales, are very limited. Some recent projects funded by the US Department of Energy have started to collect such datasets in real-world fields, but the data has not been released. While we fully understand the importance of out-of-sample testing, working with another dataset is beyond the scope of this manuscript.

Technical corrections

- At line 239, Sec. 4.4 does not exist.

Response: We have corrected the sentence by replacing 4.4 to existing 4.3..

“... and would guide future N<sub>2</sub>O related measurements and KGML model development (discussed in Sec. 4.3).”

- At line 240, I believe this should refer to Fig. 1c and 1d, not 1b and 1c.

Response: We have corrected this mistake (line 264).

“Next we used the knowledge learned from synthetic data to develop the structure of KGML-ag (Fig. 1c-d).”

- Tables 1 and 2 have identical captions but different contents.

Response: We have corrected this by replacing the right caption.

“Table 2: Prediction accuracy comparisons between non-pretrained GRU model and KGML-ag1.”

- Sections 4.1 and 4.2 are both entitled "Interpretability of KGML-ag."

Response: We have replaced the section 4.2 title to “Lessons for KGML-ag development”

### To Reviewer 3

The authors are proposing the development of a new approach KGML-ag to machine learning in estimating N<sub>2</sub>O emissions from fertilized agricultural fields. This approach involves using data generated from a process model and a mesocosm experiment to tune the relationships and their parameters among input and intermediate variables by which N<sub>2</sub>O emissions are thought to be governed. The advantages of this approach over process models are simplified input data requirements, more rapid model execution, and possibly more accurate simulation of N<sub>2</sub>O fluxes measured in experiments for which the model is tuned.

Response: We really appreciate the reviewer correctly recognizing our efforts and achievements. We want to incorporate the domain knowledge learned from agroecosystem process-based model *ecosys* to the advanced machine learning models to combine the advantages from both. Developing KGML-ag is one of the very first few attempts to realize the concept of hybrid modeling (Reichstein et al. 2019 Nature) in simulating agroecosystem biogeochemistry. To further improve our manuscript, we have carefully revised the content based on all reviewers' comments and suggestions.

The ability of this approach to simulate N<sub>2</sub>O emission events under controlled laboratory conditions is impressive. It should be noted that the N<sub>2</sub>O emissions in Fig. 2 and the soil NO<sub>3</sub><sup>-</sup> contents in Fig. 3 are much larger than those commonly encountered in field conditions. However the relationships and their parameters upon which this approach is based are not disclosed to the reader, and so remain a 'black box'. For example, in section 4.1 the processes governing the time course of N<sub>2</sub>O emissions following a urea application are described, but the method by which these processes were represented in KGML is not.

Response: We have double checked the N<sub>2</sub>O emission and NO<sub>3</sub><sup>-</sup> concentration magnitude from mesocosm and comparing with other field studies under similar conditions (Fassbinder et al., 2013; Grant et al., 1999, 2006, 2008; Hamrani et al., 2020; Venterea et al., 2011). It turned out that our magnitude for N<sub>2</sub>O (peak value around 20 mg N m<sup>-2</sup> day<sup>-1</sup>) and NO<sub>3</sub><sup>-</sup> (peak value around 50 g N m<sup>-2</sup>) are within the field observed ranges for managed crop soils. The reviewer's impression that these values being "too large" is likely because of the different units we used. Here all units are converted to daily scale as a default setting in *ecosys*, while other studies often report N fluxes using mg N m<sup>-2</sup> h<sup>-1</sup> for N<sub>2</sub>O flux and mg N kg<sup>-1</sup> for NO<sub>3</sub><sup>-</sup> concentration (in this case, peak values in our experiment are 1 mg N m<sup>-2</sup> h<sup>-1</sup> and 40 mg N kg<sup>-1</sup>). To avoid future misunderstandings of the data, we first add a sentence in data description section 2.2.2 to include the comparisons with other studies (From line 198 to 201) and then add units in Figure 2 and Figure 3 caption to notify readers about the different units being used.

"The magnitude of N<sub>2</sub>O flux and NO<sub>3</sub><sup>-</sup> soil concentration and their responses following fertilizer application from this mesocosm experiment are consistent with several field studies of agricultural soils (Fassbinder et al., 2013; Grant et al., 1999, 2006, 2008; Hamrani et al., 2020; Venterea et al., 2011)."

"Figure 2: N<sub>2</sub>O flux time series comparisons among pure non-pretrained GRU predictions (blue line), KGML-ag1 predictions (red line) and observations (black line-dot) from cross-validation. The N<sub>2</sub>O flux unit is mg N m<sup>-2</sup> day<sup>-1</sup>."

"Figure 3: IMVs prediction from KGML-ag1. The black-dot line represents observations and the red line represents the results from KGML-ag1. Chmb is the abbreviation for chamber. r<sup>2</sup> and RMSE are



calculated and present in each year and chamber. The  $\text{CO}_2$  flux and soil  $\text{NO}_3^-$  concentration units are  $\text{g C m}^{-2} \text{ day}^{-1}$  and  $\text{g N m}^{-2}$ , respectively.”

“Figure 3 Contd.: IMVs prediction from KGML-ag1. The black-dot line represents observations and the red line represents the results from KGML-ag1. Chmb is the abbreviation for chamber.  $r^2$  and RMSE are calculated and present in each year and chamber. The soil  $\text{NH}_4^+$  concentration and soil VWC units are  $\text{g N m}^{-2}$  and  $\text{m}^3 \text{ m}^{-3}$ , respectively.”

We would like to note that this study is one significant step towards none-black box use of machine learning, but fully opening the black box is one of the frontiers in ML research that still has a long way to go. We partially opened the black box by incorporating domain knowledge into a completely black box ML model via three efforts: 1) building a hierarchical structure (with black-box GRU model as basis) to simulate the important intermediate variables (IMVs) first; then the predicted IMVs are used as the additional inputs in target variable simulation (e.g.  $\text{N}_2\text{O}$ ), which will provide an opportunity to track those IMVs during the simulation period; 2) pretraining the KGML model with a process-based model so that the KGML model can perform as a surrogate model of the process-based model; 3) other techniques like using initial values to preserve state, feature importance analysis and stepwise training and fine tuning etc. With these implementations, our KGML model not only outperformed pure ML models but also was more interpretable. The ability to predict IMVs also shed light on model improvement, which is not possible or much more complicated with pure ML models.

Regarding the relationships and parameters, we will make the KGML-ag code and neural network weights open through Github once the review process is done. But explicitly describing these like what is often done for process-based models is not practical because KGML-ag is essentially a neural network model, and readers are not able to infer much directly from layers, nodes and weights.

Finally, we agree with the reviewer that in some cases why KGML performed so well needs to be explained, but this would not deny our contribution towards opening the “black box”. To reflect the reviewer’s concern, we have added in the discussion section 4.3 last paragraph (from line 558 to 562) that:

“Finally, at the current stage we can not claim to have completely opened the black box of KGML-ag, but this framework is a significant step towards this goal. For example, some ideas implemented in our study, such as using pretraining to transfer knowledge from PB model to ML model, incorporating causal relations by hierarchical structure, predicting IMVs for tracking middle changes and using initial values as input to reduce data demand, would shed light on the future KGML-ag model improvement.”

As for all black box approaches to modelling, it is vitally important that KGML be subjected to tests with truly independent datasets, i.e. datasets that are completely separate, and preferably very different, from those used in model calibration. Impressive results can always be achieved by calibrating enough parameters, but are these parameters robust? The extent to which such testing of KGML was conducted in this paper is not clear. At the very least, for this paper to be publishable, calibration and validation of KGML must be clearly distinguished, and clear evidence of independent testing must be provided. Further description of the key relationships and their parameters that govern  $\text{N}_2\text{O}$  emissions in the model should also be provided so as to improve confidence in its robustness.



Response: We agree with the reviewer that out-of-sample testing is critical for model development. In this work all results reported in Figure 4 and Figure 5 are from leave-one-out experiment. For example, we trained KGML with data from chamber 1-5 and tested it against the left out chamber 6 as the model performance. Another out-of-sample test is by comparing the prediction performance during the periods without any chamber observation data (i.e. before April 25th of each year). Results show that KGML-ag1 predicted stable N<sub>2</sub>O fluxes close to 0 mg N m<sup>-2</sup> day<sup>-1</sup> (which is close to the reality in the experiment setting) while GRU caused anomalous peaks of fluxes. This highlighted the power of KGML because KGML-ag1 has learned “knowledge” for the whole period from the pretraining process using *ecosys* model generated synthetic data. Relevant text can be found in 363-366:

“For the region without observation data (normally before day 25), KGML-ag1 predicted stable N<sub>2</sub>O fluxes close to 0 mg N m<sup>-2</sup> day<sup>-1</sup> (which is close to the reality in the experiment setting) while GRU caused anomalous peaks of fluxes. This is because KGML-ag1 has learned knowledge for the whole period from the pretraining process with *ecosys* model generated synthetic data, but GRU model has no prior knowledge for the period without any data in observations;”

and in lines 424-429:

“From these comparisons, we infer that without considering temporal dependence and pretraining process, the tree-based model including DT, RF, GB and XGB and deep learning model ANN predicted erratic peaks in almost every missing data point, while GRU model was stable in small gaps and only presented poor performance in long missing period (before 25 day). This improvement by GRU model can be attributed to the structure of GRU that naturally keeps the historical information using hidden states, which enables GRU to consider the temporal dependence and make consistent predictions over time.”

We understand these two out-of-sample tests are not in the sense of being “very different” from what the KGML model was developed. However, this is so far the best data we can access. The mesocosm experiment data we used in this study has provided a comprehensive set of inputs and intermediate variables in addition to the output of N<sub>2</sub>O fluxes, thus serving as a unique testbed. Continuous N<sub>2</sub>O flux measurements along with a comprehensive set of input and intermediate variables, especially those at hourly or daily scales, almost do not exist or are not publicly accessible. Some recent projects funded by the US Department of Energy have started to collect such gold standard dataset under field conditions, but the data needs to be accumulated for another one or two years before release. We anticipate that gold standard data will significantly benefit the development of the KGML-ag model.

Finally, we argue that the novelty and robustness of our study can be justified in a different perspective. Our results show that a well-calibrated *ecosys* is not able to reproduce many dynamics of observed N<sub>2</sub>O fluxes (Fig. S9) regardless how we tune *ecosys* parameters. A pure ML model can better reproduce the time series, but still has missed several key peaks in growing season while falsely predicted spring peak emissions even though fertilizers were not applied until several days later (Fig. 2). The KGML-ag1 leveraged the advantage of *ecosys* and the pure ML model, and outperformed both (Fig. 2). These nested comparisons clearly demonstrate the power of KGML as a framework. While we do not argue that KGML-ag is a perfect model that would be directly applicable to other places, sharing our approach will provide food-for-thought to the community on how to build a hybrid biogeochemical model that is computationally more efficient and more robust than both process-based and ML-based models. We have added new discussions about this concern in the last paragraph of section 4.3 (from line 562 to 566).

“Besides, we acknowledge the importance of further testing the KGML-ag over completely independent datasets, but results presented in this manuscript are sufficient to justify the power of KGML as a framework. The mesocosm experiment data we used in this study has provided a comprehensive set of inputs and intermediate variables in addition to the output of N<sub>2</sub>O fluxes, thus serving as a unique testbed. We expect our validation results will be more solid once more gold standard data of N<sub>2</sub>O fluxes along with other relevant inputs and intermediate variables become publicly available.”

In the Discussion, the authors rightfully address some of the factors that may limit the robustness of KGML. These limitations will likely become more apparent when the authors conduct tests of KGML under field conditions. Addressing these factors, as described by the authors, appears to require that KGML more closely resemble process-based models, and may reduce the computational advantages claimed for the KGML approach.

Response: The reviewer’s concern on decreased performance in field application is legit, and is a good hypothesis to test when more dataset become available. At this stage, we do not know whether or not these limitations will become more apparent under field conditions. But we are currently collecting new gold standard data of inputs, intermediate and N<sub>2</sub>O fluxes from both field and lab experiments, which will be used to test the reviewer’s hypothesis. We would also like to acknowledge that KGML-ag’s limitations apply to both pure ML model and process-based models under field conditions, so it is very likely KGML-ag will continue to outperform both.

Another concern by the reviewer is that further development of KGML will make it resemble process-based models, thereby reducing the computational advantages. We argue this is unlikely because the application of neural networks is faster than process-based models by multiple orders. To surrogate as many components of process-based models as possible is one research frontier in hybrid modeling for earth system science (Reichstein et al. 2019 Nature; Irrgang et al. 2021 Nature Machine Intelligence), with latest advances occurred in weather forecast (Bauer et al. 2021 Nature Computational Science). By using a hybrid model, computationally inefficient components of PB can be identified one by one, and be replaced with more efficient ML-based surrogates to eventually obtain the most efficient model, thereby resolving the concern raised by the reviewer. We have added the new discussion at the end of section 4.3 to address the reviewer’s concern (from line 566 to 573).

“Moreover, incorporating more and more domain knowledge into KGML-ag will be inevitable in further improvement, but we don’t think KGML-ag will become inefficient as it becomes more like the PB model. In fact, to efficiently surrogate components of PB models has been proposed as a research frontier in hybrid modeling for earth system science (Reichstein et al., 2019; Irrgang et al., 2021), with latest advances occurring in weather forecasts (Bauer et al., 2021). By using a hybrid model, computationally inefficient components of PB can be identified one by one, and be replaced with more efficient ML-based surrogates to eventually obtain the most efficient model. Further KGML-ag model development will also need to balance efficiency, accuracy and interpretability.”

Reference:

Bauer, P., Dueben, P. D., Hoefler, T., Quintino, T., Schulthess, T. C., & Wedi, N. P.: The digital revolution of Earth-system science. *Nature Computational Science*, 1(2), 104-113, 2021.

- Fassbinder, J. J, Schultz, N. M, Baker, J. M, & Griffis, T. J.: Automated, Low-Power Chamber System for Measuring Nitrous Oxide Emissions, *Journal of environmental quality*, 42, 606. doi: 10.2134/jeq2012.0283, 2013.
- Grant, R. F., & Pattey, E.: Mathematical modeling of nitrous oxide emissions from an agricultural field during spring thaw. *Global Biogeochemical Cycles*, 13(2), 679-694, 1999.
- Grant, R. F., & Pattey, E.: Temperature sensitivity of N<sub>2</sub>O emissions from fertilized agricultural soils: Mathematical modeling in *ecosys*. *Global biogeochemical cycles*, 22(4), 2008.
- Grant, R. F., Pattey, E., Goddard, T. W., Kryzanowski, L. M., & Puurveen, H.: Modeling the effects of fertilizer application rate on nitrous oxide emissions, *Soil Science Society of America Journal*, 70(1), 235-248, 2006.
- Hamrani, A., Akbarzadeh, A., & Madramootoo, C. A.: Machine learning for predicting greenhouse gas emissions from agricultural soils, *Science of The Total Environment*, 741, 140338, 2020.
- Irrgang, C., Boers, N., Sonnewald, M., Barnes, E. A., Kadow, C., Staneva, J., & Saynisch-Wagner, J.: Towards neural Earth system modelling by integrating artificial intelligence in Earth system science. *Nature Machine Intelligence*, 3(8), 667-674, 2021.
- Reichstein, M., Camps-Valls, G., Stevens, B., Jung, M., Denzler, J., & Carvalhais, N.: Deep learning and process understanding for data-driven Earth system science. *Nature*, 566(7743), 195-204, 2019.
- Venterea, R. T., Maharjan, B., & Dolan, M. S.: Fertilizer source and tillage effects on yield-scaled nitrous oxide emissions in a corn cropping system. *Journal of Environmental Quality*, 40(5), 1521-1531, 2011.
